1 Submission intended as an article in the Discoveries section of MBE

2

3 Title: The role of gene expression in the recent evolution of resistance in a model host parasite system

4

5 Authors: Brian K. Lohman<sup>1</sup>, Natalie Steinel<sup>1</sup>, Jesse N. Weber<sup>1,2</sup>, and Daniel I. Bolnick<sup>1</sup>.

6

7 Author affiliations: <sup>1</sup>Department of Integrative Biology, The University of Texas at Austin, One

8 University Station C0990, Austin TX, 78712. <sup>2</sup>Division of Biological Sciences, The University of

9 Montana, Missoula, Montana 59812

10

11 Corresponding author: Brian K. Lohman, lohman@utexas.edu

12

13 **Abstract:**

14 Damage by parasites is a perpetual challenge for hosts, often leading to the evolution of elaborate  
15 mechanisms of avoidance, immunity, or tolerance. Host resistance can evolve via changes in immune  
16 protein coding and/or expression. Heritable population differences in gene expression following infection  
17 can reveal mechanisms of immune evolution. We compared gene expression in infected and uninfected  
18 threespine stickleback (*Gasterosteus aculeatus*) from two natural populations that differ in their resistance  
19 to a native cestode parasite, *Schistocephalus solidus*. Genes in both the innate and adaptive immune  
20 system were differentially expressed as a function of host population, infection status, and their  
21 interaction. These genes were enriched for loci controlling immune functions that we independently  
22 verified differ between host populations, or in response to infection. For instance, populations differ  
23 strongly in reactive oxygen (ROS) production, and we observed corresponding differences in expression  
24 of ROS-affecting loci. Differentially expressed genes also were involved in fibroblast activation, B-cell  
25 activation, and leukocyte trafficking. Coexpression network analysis identified two distinct immune  
26 processes contributing to stickleback resistance; several modules of genes are correlated with parasite  
27 survival while a different set of modules are correlated with suppression of cestode growth. Comparison  
28 of networks between populations showed resistant fish have a dynamic expression profile while  
29 susceptible fish are static. In summary, recent evolutionary divergence between two vertebrate  
30 populations has generated population-specific gene expression responses to parasite infection, which  
31 reveal a few immune modules likely to separately affect cestode establishment, and growth.

32

33 **Introduction:**

34 Helminths are a diverse group of parasitic worms, which often establish long lasting infections in their  
35 vertebrate hosts (Maizels, et al. 2004), despite host immune activity. Curiously, in many host-parasite  
36 systems, helminths can persist in some host genotypes, whereas other hosts successfully eliminate  
37 infections. Therefore, a key question in biology is, why does parasite resistance differ among host  
38 individuals or populations? Host resistance depends on a complex signaling cascade, starting with the  
39 detection of pathogen molecules or pathogen induced damage to host tissues, followed by activation of a  
40 diverse suite of innate and adaptive immune cell populations. These cells may proliferate, migrate, or  
41 produce molecules that signal to other immune cells or directly attack the parasite. If the infection is  
42 cleared, the host must down-regulate this costly response (Maizels and Yazdanbakhsh 2003; Maizels, et  
43 al. 2004; Anthony, et al. 2007; Gause, et al. 2013). Natural genetic variation in host resistance could arise  
44 from any of these diverse stages of an immune cascade.

45  
46 Classically, the search for genes important to host immunity has been conducted in the lab using a  
47 combination of forward genetic experiments and screens for abnormal phenotypes (Beutler, et al. 2006;  
48 Beutler, et al. 2007). Such approaches typically identify genes in which natural or induced mutations lead  
49 to loss of immunological function. In contrast, natural selection provides a powerful genetic screen for  
50 alleles that confer adaptive benefits within the complex ecological milieu in which wild vertebrates  
51 evolved and currently live, including diverse stresses and coinfections (Beraldi, et al. 2007; Schielzeth  
52 and Husby 2014). Isolated host populations are often exposed to distinct local parasite species or  
53 genotypes, and consequently evolve divergent immune traits. Spatially varying coevolution thus leads to  
54 adaptive geographic variation in host genotypes and corresponding immune traits (Eizaguirre, et al. 2012;  
55 Stutz and Bolnick 2016) In contrast to lab knock-out screens, this natural genetic variation is more likely  
56 to entail genes whose alleles confer a change or gain of immune function. Loss of function is of course  
57 also a possibility, if parasites exploit a given host trait, or if a trait confers insufficient benefits to warrant  
58 its costs. By identifying these evolutionarily labile genes, biologists seek to understand the genetic and  
59 immunological mechanisms of vertebrate resistance to, and coevolution with, helminth parasites. The  
60 genes identified in this manner will be of interest not only for what they tell us about the basic biology of  
61 host parasite interactions, but also as a possible source of new therapeutic strategies for controlling  
62 parasitic infections or manipulating vertebrate immunity (Geary, et al. 1999; Geary, et al. 2015).

63  
64 One way to identify genes favored by natural selection is to look for evolution of gene expression in  
65 response to infection. Recent advances in sequencing technology and genetic mapping have made this an  
66 accomplishable goal (Cookson, et al. 2009; Pasaniuc and Price 2016). Previous studies have uncovered

67 variation in gene expression associated with disease in rat, mouse, and human populations (Hubner, et al.  
68 2005; Barrett, et al. 2008; Emilsson, et al. 2008; Wijayawardena, et al. 2016), but few studies have used  
69 wild populations (Hawley and Altizer 2011; Pedersen and Babayan 2011; Viney, et al. 2015; Huang, et al.  
70 2016). These studies are often underpowered, as the historically high cost of RNAseq library prep and  
71 sequencing limited biological replication (Todd, et al. 2016). Few studies of variation in disease in wild  
72 populations have included more than a single population (Pedersen and Babayan 2011) or considered the  
73 effect of exposure on those individuals who did not ultimately become infected. Finally, linking changes  
74 in gene expression to host immune function requires concurrent measurement of multiple immune  
75 phenotypes, which are also missing from the majority of existing studies of wild populations of hosts.  
76 Here, we seek to close this gap by testing the effect of exposure or infection on gene expression, using a  
77 large number of individuals from two populations with independent evidence of immune trait divergence.

78  
79 We tested whether host genotype and infection status alter host gene expression, using the threespine  
80 stickleback fish (*Gasterosteus aculeatus*) and its native cestode parasite *Schistocephalus solidus* as a  
81 model host-parasite system. The cestode's eggs are deposited into freshwater via bird feces, then hatch  
82 and are consumed by copepods, which are in turn consumed by stickleback. Cestodes mature only in  
83 stickleback peritoneum, their obligate host, then mate inside the gut of piscivorous birds. This life cycle  
84 can be recapitulated in the lab, permitting controlled genetic crossing (Schärer and Wedekind 1999) and  
85 controlled infections among host or parasite genotypes. There is naturally occurring variation in cestode  
86 infection rates among stickleback populations throughout their native range (MacColl 2009; Weber, et al.  
87 2017). This is mirrored by differences in expression of a select few immune genes, between wild caught  
88 stickleback from six populations, and between wild caught fish with versus without cestodes (Lenz,  
89 Eizaguirre, Rotter, et al. 2013; Stutz, et al. 2015).

90  
91 Recently, Weber *et al.* identified natural populations of stickleback with dramatically different resistance  
92 to *S. solidus*. Marine stickleback, which resemble the likely ancestral state for modern freshwater  
93 populations, rarely encounter the cestode because its eggs do not hatch in brackish water. These fish  
94 genotypes are therefore highly susceptible to infection in laboratory exposure trials. When marine  
95 stickleback colonized post-glacial freshwater lakes, they encountered cestodes and evolved increased  
96 resistance to infection by cestodes (Weber, et al. 2017).

97  
98 However, not all derived freshwater populations are equally resistant. On Vancouver Island in British  
99 Columbia, Gosling Lake (Gos) stickleback are heavily infected by cestodes (50 to 80% of fish, per year,  
100 from 10 years of observations). In contrast, the cestode is absent in stickleback from nearby Roberts Lake

101 (Rob) over the same period of time (18 km away)(Weber, et al. 2016). The first host (copepods) and  
102 terminal hosts (piscivorous birds, mostly loons and mergansers) are common in both lakes. Diet data from  
103 both lakes shows that Rob and Gos fish consume copepods at an equal rate (Snowberg, et al. 2015;  
104 Weber, et al. 2016). The difference in infection rates is therefore not likely to be merely ecological.  
105 Accordingly, (Weber, et al. 2017) used experimental infections to confirm that Rob fish are more resistant  
106 to infection than Gos fish. In the lab, cestodes infect Rob and Gos stickleback at statistically  
107 indistinguishable rates, but Rob fish greatly reduce cestode growth (by two orders of magnitude). Rob  
108 fish are able to subsequently kill established cestodes by initiating peritoneal fibrosis which sometimes  
109 leads to the formation of a cyst and cestode death. While the mechanism underlying this cestode growth  
110 suppression and killing is uncertain, potential correlates are suggestive. Lab-reared Rob fish (or, F<sub>1</sub>  
111 hybrids with a Rob dam) have a higher granulocyte:lymphocyte ratio following infection. In Rob fish, a  
112 higher fraction of the granulocytes generate reactive oxygen species (ROS), and these constitutively  
113 produce more ROS than cells from Gos fish. ROS is thought to damage the cestode tegument, and ROS  
114 production was negatively correlated with cestode growth. This higher ROS production by Rob fish is  
115 constitutive rather than induced by infection.

116  
117 Given the immune phenotypes that differ between Rob and Gos stickleback, we hypothesized that these  
118 populations would exhibit constitutive and infection-induced differences in gene expression. Furthermore,  
119 we expected these differences to involve differential expression of immune genes, particularly those  
120 involved in ROS production and fibrosis. To test these hypotheses, we quantified gene expression of head  
121 kidneys from lab-reared Rob and Gos stickleback from three treatments: control, exposed but uninfected,  
122 and infected by *S. solidus*. We tested for: i) genes whose expression differs constitutively between  
123 populations, ii) genes which are involved in general responses to cestodes shared by both host  
124 populations, and iii) genes whose expression depends on the interaction between host population and  
125 infection status. Genes whose expression depends on an interaction between population and infection  
126 status are prime candidates for explaining how these populations respond differently to cestodes,  
127 ultimately resulting in significantly different parasite burdens. Additionally, we tested for correlations  
128 between modules of coexpressed genes and immune phenotypes (e.g. ROS production and  
129 granulocyte:lymphocyte ratio). The number of correlated suites of genes and their correlations with  
130 various immune phenotypes can give insight into pathway level phenotypes for further study. In  
131 particular, we wish to know whether cestode establishment, and cestode growth, are correlated with  
132 similar or different gene expression modules implying a shared or separate immunological cause.

133

134 **Results and Discussion:**

135 We obtained mRNA from the head kidneys of stickleback from three experimental groups: unexposed  
136 controls (N = 16 and 19, Rob and Gos fish, respectively), exposed but ultimately uninfected stickleback  
137 (N = 21 and 16), or exposed and infected (N = 17 and 9) fish. Tissues from the latter two groups were  
138 harvested 42 days post exposure. See (Weber, et al. 2016) for full experimental methods. We focus on  
139 expression in head kidneys as it is the major site of immune cell differentiation in fish (Scharsack, et al.  
140 2004; Fischer, et al. 2006; Scharsack, et al. 2007; Fischer, et al. 2013), and head kidney cell cultures were  
141 used to measure immune function independently of gene expression. Below we present and interpret  
142 candidate genes from our linear models (see Table 1 for summary statistics).

143

#### 144 *Main effect of population on immune gene expression*

145 Our negative binomial linear models (see Materials and Methods) identified 643 genes that were  
146 differentially expressed as a function of stickleback population (Wald,  $p < 0.1$  after 10% FDR correction;  
147 361 genes after 5% FDR). These main effects of population represent genes whose expression differs  
148 constitutively between populations (regardless of infection status). Because these differences occur in lab-  
149 raised fish, they represent heritable between-population differences in RNA abundance. Because we  
150 measured gene expression from the entire head kidney, expression differences could reflect evolved  
151 changes in gene regulation per cell, changes in cell population composition, or both). A caveat is that  
152 because we used first-generation lab-reared fish, we are as yet unable to rule out maternal or other  
153 epigenetic effects. However, comparison of Rob, Gos, and reciprocal F<sub>1</sub> hybrids revealed little evidence  
154 for maternal effects on infection outcomes or immune traits (with the exception of  
155 granulocyte:lymphocyte ratio)(Weber, et al. 2016). So, we consider maternal effects unlikely for most of  
156 the differentially expressed genes documented here.

157

158 Previous studies have considered the effect of genotype on changes in stickleback immune gene  
159 expression in controlled lab infection experiments. However, these results are conflated with other factors  
160 such as environment (i.e., comparing wild-caught lake, stream, and estuary stickleback) and multiple  
161 exposures to parasites (Lenz, Eizaguirre, Rotter, et al. 2013). Host genotype was also considered in an  
162 experimental infection of honeybees, revealing significant host genotype effects on both gene expression  
163 and infection phenotypes (Barribeau, et al. 2014). Furthermore, host genotype effects could be potentially  
164 very important in mosquito-malaria interactions, including a unique example of dual-species  
165 transcriptomics (Choi, et al. 2014). Clearly host genotype effects in macroparasite infection are worthy of  
166 future study.

167

168 Gene ontology (GO) showed that these differentially-expressed genes are significantly enriched for  
169 several categories related to mitochondrial respiration, which can affect ROS production (Figure 1,  
170 cellular components, Mann-Whitney U,  $p < 0.01$  after 10% FDR correction). Rob lake fish also have  
171 higher expression of B-cell lymphoma 2 (*bcl2*, ENSGACG00000004283,  $\log_2\text{foldchange} = 0.99$ , Wald  $p$   
172  $< 0.01$  after 10% FDR correction), a mitochondrial membrane protein which mediates the release of ROS-  
173 producing cytochrome C into the cell and promotes cell survival in the presence of oxidative stress  
174 (Martindale and Holbrook 2002). We observed significant differences in expression of two copies of  
175 another mitochondrial adaptor, tripartite motif 14 (TRIM14). Surprisingly, expression of each gene copy  
176 changes in opposite direction between the two host populations (ENSGACG00000018044:  $\log_2\text{fold}$   
177  $\text{change} = -1.78$ , Wald  $p < 0.01$  after 10% FDR correction, ENSGACG00000011287:  $\log_2\text{fold change} =$   
178  $1.26$ , Wald  $p < 0.01$  after 10% FDR correction). TRIM14 is part of the innate immune system (Zhou, et  
179 al. 2014), and has been shown to be under balancing selection among other populations of stickleback  
180 (Hohenlohe, et al. 2010). While the majority of differences in TRIM14 expression are constitutive  
181 population effects, there is a single copy depends on an interaction between population and infection  
182 status (see below). Together, the population differences in ROS-associated gene expression supports our  
183 observation of significantly greater ROS production in Rob stickleback. It is important to note that these  
184 genes are differentially expressed between populations regardless of infection status, consistent with prior  
185 observations that ROS production is constitutive, insensitive to infection status (Weber, et al. 2016).

186  
187 Major histocompatibility complex II (MHC II) is a key element of the adaptive immune system, involved  
188 in pathogen recognition. Regardless of infection status, Rob fish have higher MHC II expression than do  
189 Gos fish, for two different copies of MHC II (ENSGACG00000000336:  $\log_2\text{fold change} = 3.67$ , Wald  $p$   
190  $< 0.01$  after 10% FDR correction, ENSGACG00000017967:  $\log_2\text{fold change} = 3.39$ , Wald  $p < 0.01$  after  
191 10% FDR correction). This difference in transcript abundance could be due to changes in the relative  
192 abundance of antigen presenting cells (APCs) such as macrophages, which express MHC II (Murphy  
193 2011). To test this possibility we tested another statistical model to determine whether variance-stabilized  
194 expression of each MHC copy covaried with the proportion of granulocytes (as opposed to lymphocytes)  
195 in a head kidney primary cell culture, controlling for population and infection status. Rob fish have  
196 relatively more granulocytes when infected (Weber, et al. 2016), so we expected a positive correlation  
197 between MHC II expression and granulocyte production. Instead, the correlation was negative  
198 (ENSGACG00000000336:  $\beta = -0.0262$ ,  $t = -1.76$  ENSGACG00000017967:  $\beta = -0.022$ ,  $t = -1.98$ ). Our  
199 working model to explain this result is that Rob fish have constitutively higher abundance of MHC II in  
200 their head kidneys because they have higher numbers of antigen presenting cells regardless of infection  
201 status. When challenged by cestodes, Rob fish initiate a strong innate immune response, proliferating

202 granulocytes but not antigen presenting cells. This infection-dependent proliferation of non-APC  
203 granulocytes may dilute the relative abundance of MHC transcript, resulting in the observed negative  
204 correlation between MHC and granulocyte abundance.

205  
206 Previous work has focused on the role of MHC allelic variation in stickleback-parasite interaction,  
207 resistance, and local adaptation (Kurtz, et al. 2004; Wegner, et al. 2006; Lenz, Eizaguirre, Kalbe, et al.  
208 2013). However, most of this work centers on MHC allelic composition and its correlation to infection  
209 and growth phenotypes (as a proxy for fitness). Many fewer studies quantify expression of MHC alleles.  
210 One study noted increased expression of MHC II in wild fish which were more heavily parasitized,  
211 especially when MHC allele diversity was low (Wegner, et al. 2006). However, only a single population  
212 of fish was considered, so our discovery of significant effect of population (Rob vs. Gos) on MHC II  
213 expression is therefore novel. It is important to note that stickleback have more than two copies of MHC  
214 II. Previous sequencing efforts have suggested that stickleback have between 4 and 6 copies of MHC II  
215 (Sato, et al. 1998; Reusch, et al. 2004; Reusch and Langefors 2005). Because TagSeq does not sequence  
216 the entirety of the mRNA, we cannot distinguish all MHC haplotypes present in individual fish. It is  
217 therefore possible that differences in expression of the two variants described here is due to altered  
218 regulation of only particular alleles or paralogs.

219  
220 *Transcriptomic response to exposure or infection*

221 Surprisingly, no genes differed between control versus exposed-but-uninfected fish (Wald,  $p > 0.1$  after  
222 10% FDR correction). This could be because resistant fish quickly mounted a response to the cestode,  
223 eliminated the parasite, and then down-regulated immune function by our 42-day sample date. Or, early-  
224 acting resistance to the cestode may involve physical or chemical barriers to entry that entail constitutive  
225 gene expression or non-genetic effects (e.g., gut epithelial mucous, protective symbiotic bacteria, etc).  
226 Finally, early-stage infections may induce localized immune responses in the intestinal epithelium or  
227 peritoneum that are not reflected in head-kidney gene expression.

228  
229 Once the cestode establishes in the peritoneum, however, it induces some shared changes in gene  
230 expression of all host genotypes. We identified 64 genes that were differentially expressed between  
231 control and infected fish (Wald,  $p < 0.1$  after 10% FDR correction), across both host genotypes. Several  
232 of these genes are promising candidates because of their known role in host immunity. For example,  
233 infected fish increase expression of *ndufs8*, a component of complex I which is the main ROS producer in  
234 cells (ENSGACG00000017764: log<sub>2</sub>fold change = 0.88, Wald  $p < 0.08$  after 10% FDR correction)  
235 (Procaccio, et al. 1997). Other subunits of complex I are more highly expressed in Rob fish regardless of



236 infection status, consistent with their higher constitutive production of ROS. Therefore, *ndufs8* may be  
237 particularly important in regulating the induction of ROS in response to infection, because it is the only  
238 complex I subunit upregulated upon infection. ROS are reduced when they act on their targets, and the  
239 raw materials can be recycled through the biliverdin/bilirubin redox cycle (Barañano, et al. 2002).  
240 Infected fish from both populations have higher levels of *blvrb* (biliverdin reductase B), one of the two  
241 enzymes in this ROS-recycling system (ENSGACG00000012552: log2fold change = 1.14, Wald  $p < 0.07$   
242 after 10% FDR correction). This up-regulation should facilitate removal of ROS that may limit damage to  
243 host tissues, or facilitates subsequent ROS production.

244  
245 Another important aspect of ROS-based immunity is the associated inflammation. Infected fish have  
246 decreased expression of *nfkbiaa* (nuclear factor kappa light polypeptide gene enhancer in B-cell inhibitor  
247 alpha a), which interacts with NF- $\kappa$ B to inflammation (ENSGACG00000005065: log2fold change = -  
248 0.49, Wald  $p < 0.07$  after 10% FDR correction). *Nfkbiaa* inhibits the pro-inflammatory NF- $\kappa$ B by either  
249 preventing NF- $\kappa$ B proteins from entering the nucleus, where they are active, or by blocking NF- $\kappa$ B  
250 transcription factor binding sites. NF- $\kappa$ B activation by TNF $\alpha$  or LPS reverses this binding and allows NF-  
251  $\kappa$ B to activate expression of pro-inflammatory genes (Verma, et al. 1995). Thus, decreased *nfkbiaa*  
252 expression suggests an increased inflammatory response following successful infection.

253  
254 Infected fish also have a slight decrease in expression of CD40 (ENSGACG00000011155:  
255 log2foldchange = -0.38, Wald  $p < 0.1$ ), a co-stimulatory molecule expressed on dendritic cells,  
256 macrophages, and B-cells, which activates T- and B-cells (Murphy 2011). Previous studies have  
257 suggested that helminths could potentially suppress stickleback adaptive immunity (Scharsack, et al.  
258 2007), and the downregulation of CD40 is one plausible mechanism. Alternatively, fish with inherently  
259 lower CD40 expression may be more susceptible to infection. This raises a broader question that we are  
260 not yet able to answer, but which warrants further study: to what extent are the expression differences  
261 between infected and control fish a result of host immune response or parasite immune suppression?

262  
263 CD40 expression is not limited to immune cells, but can also be expressed in fibroblasts (Grewal and  
264 Flavell 1998), so its precise function in stickleback infection by cestodes is unclear. This dual role is  
265 intriguing because fibroblast activation is associated with the formation of fibrotic cysts that encapsulate  
266 cestodes (Zeisberg, et al. 1999). These cysts likely restrict cestode movement and concentrate ROS while  
267 limiting damage to host tissues. Recall that this is a population specific defense, exhibited by Rob but not  
268 Gos fish (Weber, et al. 2016), and in this statistical contrast the effect of population is averaged. In  
269 addition to changes in CD40, our linear model identified an increase of expression of *fibronectin* in

270 infected Rob fish, which contributes to fibrinogen production to build cysts (Gratchev, et al. 2001;  
271 Anthony, et al. 2007) (ENSGACG00000015164: log2fold change = 0.89, Wald  $p < 0.07$  after 10% FDR  
272 correction).

273  
274 Adaptive immune system genes also respond to cestode infection. *Tspan33* has recently been shown to be  
275 a marker for activated B-cells in vertebrates (Hevezi, et al. 2013; Perez-Martinez, et al. 2015). The  
276 presence of activated B-cells indicate the host immune system has recognized the parasite and is actively  
277 mounting a defense. In our study, infected fish show higher levels of *tspan33* compared to controls  
278 (ENSGACG00000019698: log2fold change = 1.04, Wald  $p < 0.07$  after 10% FDR correction). Increased  
279 expression of *tspan33* in infected fish is consistent with increased activation of B-cells, an integral part of  
280 the adaptive immune response.

281  
282 *Genotype by infection interactions*

283 The higher resistance to *S. solidus* infection in Rob compared to Gos stickleback could be due to  
284 constitutive differences in gene expression (as documented above), or differences in the induced immune  
285 response to infection. The latter can be detectable via interactions between host genotype and infection  
286 status. Linear modeling results identified 16 genes significant for this interaction (Wald  $p < 0.1$  after 10%  
287 FDR correction). Most of these genes are known to affect the immune traits that (Weber, et al. 2016)  
288 already showed are divergent between Rob and Gos fish. For example, glutathione peroxidase 1a (*gpx1a*)  
289 is an enzyme that degrades hydrogen peroxide, a type of ROS, into glutathione and water (Turrens 2003).  
290 Expression of *gpx1a* in Gos fish increases upon infection, and therefore should tend to decrease the  
291 amount of ROS (hydrogen peroxide) available to defend against cestodes (ENSGACG00000010455:  
292 log2foldchange = -1.86, Wald  $p < 0.07$  after 10% FDR correction). We speculate that this proactive  
293 down-regulation upon infection might be a tolerance response to mitigate autoimmune damage by Gos  
294 fish, which are commonly infected and therefore might not be able to tolerate a strong ROS response. The  
295 cytochrome c complex produces ROS (Turrens 2003), and we see increased expression of Cytochrome c  
296 oxidase subunit IV (*cox4il*) in Rob fish that are infected, while Gos fish decrease expression  
297 (ENSGACG00000015963: log2foldchange = 0.43, Wald  $p < 0.06$  after 10% FDR correction). This gene  
298 expression data is consistent with our phenotypic data showing that Rob fish have more ROS producing  
299 macrophages than Gos fish, and more ROS per cell. This *cox4il* up-regulation in Rob fish may be  
300 amplified by population differences in *bcl2* (see above). Oddly, we do not observe a significant infection-  
301 induced increase in ROS production in fish of either genotype. This discrepancy may reflect our head-  
302 kidney cell-culture based ROS assay, which does not rule out changes in ROS *in vivo* or in other tissues.

303

304 The one contrary result involves colony stimulating factor 1b (*csf1b*), a paralog of *csf1/mcsf*, a well-  
305 studied regulator of monocytes in mammals (Akagawa, et al. 2006). *csf1* increases the production of head  
306 kidney leukocytes (which includes granulocytes) in trout (*Oncorhynchus mykiss*)(Wang, et al. 2008). In  
307 our study, *csf1b* is downregulated in infected Rob fish even though they have more granulocytes (which  
308 includes macrophages) relative to either Gos fish or to uninfected Rob fish (ENSGACG00000002844:  
309  $\log_2\text{foldchange} = -1.11$ , Wald  $p < 0.08$  after 10% FDR correction). This discrepancy may be resolved by  
310 recognizing that we examined a single time point post-exposure. It is likely that Rob fish initially increase  
311 *csf1b* or another gene to drive the granulocyte proliferation that we observe after infection. The down-  
312 regulation of *csf1b* 42 days after infection could be a homeostatic mechanism to suppress further  
313 macrophage proliferation, after they already reached sufficient abundance. Further time series analyses  
314 would be necessary to resolve this hypothesis.

315  
316 Finally, adaptive immune system genes also exhibit population specific responses to infection. Activated  
317 B-cells are critical to mounting an adaptive immune response, and they are targeted by various cytokines  
318 (Murphy 2011). When challenged by cestodes, Rob fish increase expression of C-X-C motif chemokine  
319 ligand 19 (*cxcl19*). In contrast, cestode infection reduces *cxcl19* expression in Gos fish, which otherwise  
320 exhibit constitutively higher expression than Rob fish (ENSGACG00000019078:  $\log_2\text{foldchange} = -1.17$ ,  
321 Wald  $p < 0.06$  after 10% FDR correction; Fig 2). Ligands with this motif induce migration of leukocytes  
322 (Belperio, et al. 2000). Literature on *cxcl19* is rare, but it has been suggested that the zebrafish *cxcl19*  
323 gene is orthologous to Il-8, a major mediator of leukocyte migration to sites of inflammation (Wang, et al.  
324 2008). Regardless of whether *cxcl19* is involved specifically leukocyte trafficking to sites inflammation or  
325 increasing migration of leukocytes in the absence of inflammation, both of these immune mechanisms  
326 could play an important role in defense against cestodes.

327  
328 *Expression – trait covariance*

329 We tested for correlations between patterns of gene expression and immune/cestode phenotypes using  
330 weighted gene co-expression network analysis (WGCNA). WGCNA provides an unbiased data-driven  
331 hierarchical clustering of genes with similar expression patterns, thereby reducing the number of genes  
332 under consideration (reduced multiple test correction) and identifying functionally similar gene modules  
333 which can be used for further statistical analysis (Langfelder and Horvath 2008). WGCNA is a more  
334 appropriate analysis for incorporating additional immune phenotype data that was collected during the  
335 infection experiment not only because of its continuous nature (vs. the categorical predictors of  
336 population and infection status) but also because the correlation between suites of co-expressed genes and  
337 traits is estimated independently for each trait, rather than simultaneously (as under the linear modeling

338 framework), resulting in lower unexplained variance to be assigned to other traits. We used a two-step  
339 process, first looking for general pathways and subsequent correlations to phenotypes by using all  
340 samples to construct a signed network. Second, we tested for genotype-dependent network structure and  
341 module-trait correlation by building signed networks for each population of stickleback. The latter case  
342 may be especially pertinent if the regulation of gene expression plays a strong role in the genotype  
343 dependent response to infection. To explore this, we calculated module similarity between the Rob and  
344 Gos signed networks as the fraction of genes shared between any two given modules.

345  
346 When all samples were combined to build a single signed coexpression network, WGCNA analysis  
347 revealed modules that were correlated with host population, ROS production, infection status, number of  
348 cestodes, total cestode mass, the density of cells in host head kidney, the frequency of  
349 granulocytes/lymphocytes, the fraction of cells gated into various subpopulations including precursors,  
350 myeloid, and eosinophils, and finally, host families (data not shown, but this highlights the need to  
351 include family as a nested factor in the linear modeling of DESeq2).

352  
353 Population differences are mainly captured by the turquoise, green, magenta, and greenyellow modules,  
354 with lesser contributions by the blue and red modules (Figure 3). These population-dependent modules  
355 have connections to population-dependent phenotypes such as ROS production. For example, top kME  
356 genes in the turquoise modules (positive correlation with Rob) include ROS producing cytochrome c  
357 oxidase genes and ROS recycling *gpx1a* (Figure 2). Together, we would expect the action of these genes  
358 to increase ROS levels. As expected the turquoise module has a positive correlation with ROS production  
359 ( $r = 0.36$   $p = 2e-4$ , Figure 3).

360  
361 Some module-trait correlations reinforce prior inferences about the immunological basis of stickleback  
362 resistance to the cestode. For example, the black module has modest to strong correlations with infection  
363 status, cell population phenotypes including density of all cells, precursors, and myeloids but is not  
364 correlated to ROS production ( $r = 0.13$   $p = 0.2$ , Figure 3). In contrast, the magenta and greenyellow  
365 modules are correlated with ROS production and also with cestode size, but much less so with cell  
366 population phenotypes and not at all with infection status (Figure 3). These observations imply that  
367 stickleback prevention of cestode establishment, and suppression of cestode growth, entail two distinct  
368 immune pathways (innate response and ROS production, respectively).

369  
370 The magenta module has a modest, but strongly significant correlation to the fraction of cells that are  
371 eosinophils ( $r = 0.28$ ,  $p = 0.005$ ). A recent review highlighted the importance of eosinophils in host-

372 helminth interactions. Specifically, at the site of host tissue damage, eosinophils are primed by  
373 fibronectin, and produce a variety of proteins which are toxic to helminths. Furthermore, the diversity of  
374 eosinophil cell surface receptors makes them central to mediate the inflammation response. Finally,  
375 helminths appear to have a number of anti-eosinophil proteins which both evade and dampen host  
376 response to the presence of helminths (Shin, et al. 2009).

377  
378 Constructing separate signed coexpression networks for each population reveals dramatic differences in  
379 network structure. Using the same construction parameters for each population, the Rob network  
380 resembles the combined population network, showing strong module-trait correlations for worm size, cell  
381 population phenotypes, ROS production, and sex across many different modules. In stark contrast, the  
382 Gos network is much more static, with only a subset of traits which were previously significant correlated  
383 to a single module. Overall, Gos fish have many fewer total modules and correlations between modules  
384 and traits are much weaker. To estimate relationships between networks we calculated module similarity  
385 between every pair of Rob and Gos modules by shared gene membership. Broadly, large modules in Gos  
386 are split into many smaller modules in Rob. Thus, we conclude that there are two possible outcomes: 1)  
387 the Rob fish have evolved a more modular and dynamic repertoire of expression with which to fend off  
388 cestodes, or 2) the Gos fish evolved to maintain constitutive gene expression in response to cestodes,  
389 instead adopting a tolerance strategy (see supplementary materials for population specific module-trait  
390 heat maps and module similarity heat map).

391  
392 Our WGCNA results confirm observed population differences in immune function and patterns of gene  
393 expression in the linear modeling. Furthermore they support our hypothesis that there are two traits  
394 involved in stickleback resistance to cestodes: 1) innate immune response to prevent cestode  
395 establishment and 2) limiting worm growth once cestodes become established. These two traits separate  
396 into distinct modules of gene expression, each enriched for genes with immunological function matching  
397 *a priori* expectations. This two trait perspective refines the question of variation in cestode prevalence  
398 among stickleback populations from by focusing attention on early and late stage infection. Future studies  
399 will be needed to describe the full time-series of gene expression as exposure and infection proceeds in  
400 these study populations, and to establish directionality of the interaction between cestodes and  
401 stickleback. While others have argued that cestodes are the primary drivers of coevolution (Scharsack, et  
402 al. 2007), only by sequencing both host and parasite mRNAs can we hope to detail this interaction at the  
403 molecular level. Host genotype by parasite genotype interactions offer a promising opportunity for further  
404 study. Such GxG interaction was recently described in the stickleback-cestode system, but only  
405 documented growth phenotypes, and did not attempt to describe the genetic basis for such traits (Kalbe, et

406 al. 2016). We maintain that this type of study provides a means to identify evolutionarily labile genes  
407 which underlie beneficial shifts in immune function across the geographic mosaic of host-parasite  
408 coevolution.

409

410 *Summary:*

411 Using a large scale controlled laboratory infection experiment, we find changes in gene expression  
412 between two host populations, and as a function of infection status. For a smaller portion of genes, the  
413 expression response to infection differed between the two host populations. These findings are consistent  
414 with observations of host immune function in said infection experiment (Weber, et al. 2016). ROS  
415 production and recycling, B cell activation and targeting, and fibrosis appear to play important roles in  
416 stickleback defense against cestodes. Our analysis also suggests that host resistance involved two  
417 components; response to challenge by cestodes, and control over cestode growth. Furthermore,  
418 differences in coexpression networks between populations suggest that either Rob fish have evolved a  
419 more elaborate expression profile or that Gos fish are shutting down expression to tolerate cestodes. Our  
420 results not only suggest a mechanistic link between host immune phenotypes and candidate genes, but  
421 also provide the foundation for studying the direct effects of host alleles on parasite fitness.

422

## 423 **Materials and Methods:**

424 *Sample collection, sequence library construction, and analysis of flow cytometry data:*

425 Stickleback samples were generated as part of a large lab infection experiment (Weber, et al. 2016).  
426 Briefly, head kidneys were dissected from stickleback and preserved in RNAlater at -20°C. Libraries were  
427 constructed according to (Lohman, et al. 2016). Samples were sequenced on the Illumina HiSeq 2500 at  
428 the Genome Sequence and Analysis Facility at the University of Texas at Austin, producing ~6.7M raw  
429 reads per sample. See (Weber, et al. 2016) for ROS and flow cytometry methods. Flow cytometry data  
430 was analyzed using FlowJo software (Treestar). Granulocyte and lymphocyte populations were defined  
431 based on gating described in (Weber, et al. 2016). Precursor, myeloid, and eosinophil populations were  
432 defined using gating as described in (Wittamer, et al. 2011).

433

434 *Bioinformatics:*

435 TagSeq reads were processed according to the iRNAseq pipeline (Dixon, et al. 2015), using version 79 of  
436 the stickleback transcriptome from Ensemble, producing 9077 genes among all samples. Transcriptome  
437 annotations were based on the UniProtKB database (<http://www.uniprot.org/help/uniprotkb>) and followed  
438 previously described procedures (Dixon, et al. 2015). Code for the iRNAseq pipeline can be found here:

439 [https://github.com/z0on/tag-based\\_RNAseq](https://github.com/z0on/tag-based_RNAseq). Code for the annotation pipeline can be found here:

440 <https://github.com/z0on/annotatingTranscriptomes>.

441

442 *Statistical analysis with DESeq2:*

443 We scanned for outliers using arrayQualityMetrics (Kauffmann, et al. 2009) and removed 1 sample  
444 because of insufficient read depth. (final N = 98). To test for differential gene expression we used the  
445 following model in DESeq2:

446

$$447 \quad Y_{ij} \sim \beta_{Batch} + \beta_{Population} + \beta_{InfectionStatus} + \beta_{Population*InfectionStatus} + \epsilon_{ij} \quad (1)$$

448

449 where  $Y_{ij}$  is the count of gene  $i$  in individual  $j$ ,  $\beta_{Population}$  is a fixed effect with two levels: Rob and Gos,  
450  $\beta_{InfectionStatus}$  is a fixed effect with three levels: control, exposed (but not infected), and infected, and full-  
451 sibling families are nested within populations.  $\beta_{Batch}$  is the lane on which samples were sequenced. An  
452 additional predictor  $\beta_{Sex}$  was included for genes when appropriate (lower AIC score), and improved the  
453 model fit of 839 genes total. We fit the full model (including sex) to all genes and then extracted only the  
454 839 that were improved by the addition of sex and looked for significant p values for main effects and  
455 interactions. With the full model, 67 of these ‘sex improved’ genes were significantly different between  
456 populations. No genes were significant for either exposure or infection, and 1 gene was significant for the  
457 interaction of population and infection status (myosin 5ab, ENSGACG00000006025: log2foldchange =  
458 2.98, Wald p = 0.07). All p-values were multiple test corrected using 10% FDR. Although fish from the  
459 controlled infection experiment were exposed to three different parasite genotypes (each family exposed  
460 to only one parasite genotype), we are only interested in the host response to any parasite, and therefore  
461 average across parasite genotypes by simply not including this as a term in our linear model.

462

463 *Gene Ontogeny with GO\_MWU:*

464 We used the Mann-Whitney U test for GO analysis. This approach has been described (Wright, et al.  
465 2015) and the code for analysis can be found here: [https://github.com/z0on/GO\\_MWU](https://github.com/z0on/GO_MWU)

466

467 *Weighted coexpression gene network analysis:*

468 Raw read counts were normalized using limma (Ritchie, et al. 2015) for input into WGCNA (Langfelder  
469 and Horvath 2008). Following the walkthrough in (Langfelder and Horvath 2008), we built a signed  
470 network with a soft thresholding power of 7, and a minimum module size of 30 genes. Following  
471 dynamic tree cut, we merged modules with greater than 80% similarity, producing 14 modules. We  
472 separated Rob and Gos samples and repeated this process with the same parameters.

473

474 *Caveats and limitations:*

475 Our study flips the traditional search for immune candidate genes from inbred lab strains to wild  
476 populations, using historical natural selection as a tool to screen for changes in gene expression associated  
477 with parasite infection. While our host-parasite model system is powerful, it does have some limitations.  
478 The reference genome is of generally good quality but annotation is lacking (approximately 22.5% of the  
479 entries in the stickleback genome are either unnamed or labeled as novel genes). Thus, GO analysis is  
480 performed after assigning GO accession terms by BLAST homology, rather than functional verification, a  
481 common solution for non-model systems. The features of the stickleback genome may be missing  
482 potentially interesting immunological genes which are sufficiently diverged from human or mouse genes  
483 and therefore may be unannotated. In particular, the number and location of MHC II paralogs remains  
484 uncertain, illustrating need for genome sequence improvement.

485 Our linear modeling with DESeq2 employs appropriate FDR correction, but we choose to accept  
486 higher than 'standard' p-values associated with LFC because of the direct connection between candidate  
487 genes and independently observed immune phenotypes. If, for example, we had not measured immune  
488 phenotypes, we would not accept  $\log_2$  fold changes in expression with associated p-values greater than  
489 0.05 but less than 0.1. Furthermore, we chose a very low base min mean filter because we have high  
490 confidence in detecting lowly expressed genes (Lohman, et al. 2016). We also wished to include more  
491 genes in our enrichment analysis and this also detracts from our power due to multiple test correction. We  
492 accordingly accept slightly larger than normally allowed p-values. Our TagSeq based approach has been  
493 shown to be at least as good as total RNAseq methods (having an equal or higher correlation between  
494 observed and known values of a spike in control), but does not account for splice variants or copy number  
495 variation, which may be potentially important in the evolution of immune responses.

496 Our study used tissue from a single organ (head kidneys) for both gene expression and immune  
497 phenotype measures. Head kidneys are a crucial hematopoietic organ in fish, but analysis of other tissues  
498 may produce different results. Moreover, head kidneys contain multiple immune cell populations that we  
499 are unable to sort effectively for cell-type-specific expression studies. We do use cell population counts  
500 (proportion granulocytes versus lymphocytes) as a covariate, which as noted for MHC weakly contributes  
501 to expression variation of a few genes. But, lacking monoclonal antibodies to many immune cell receptors  
502 in stickleback, we cannot readily distinguish among finer subdivisions of cell types. This resource  
503 limitation, typical of most non-model organisms, limits our ability to statically detect effects of cell  
504 population composition on expression.

505

506 **Acknowledgements:**



507 This work was supported by the Howard Hughes Medical Institute (DIB). We thank John Lovell and  
508 Marie Strader for helpful comments during data analysis and writing.  
509

510 **Figure 1.** Linear modeling reveals differences between populations and by infection status (all genes  $p <$   
511  $0.1$  after 10% FDR correction). Genes which are differentially expressed between Rob and Gos are  
512 enriched for mitochondrial respiration (cellular components, Mann-Whitney U,  $p < 0.01$  after 10% FDR  
513 correction). GO categories in red are upregulated, while blue indicates downregulated, relative to Gos.  
514 Numbers indicate genes present in category / total genes in category.  
515

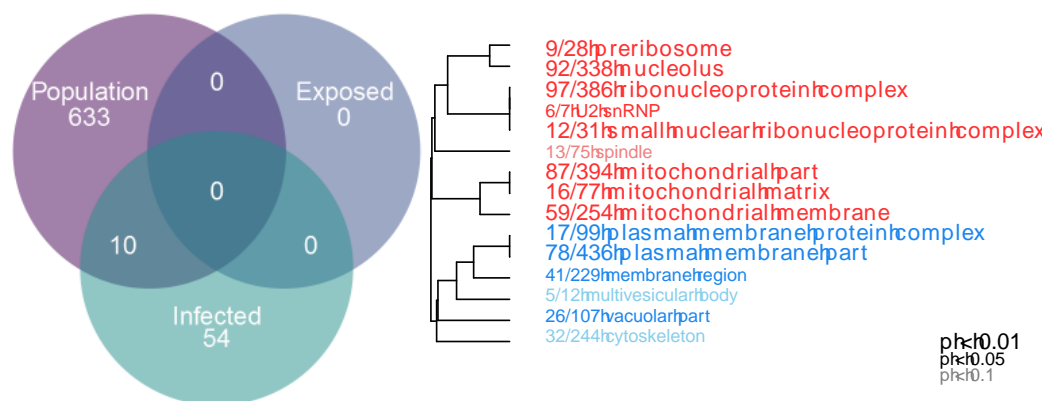

516

517 **Figure 2.** ROS production and B cells respond to infection by cestodes, both in a population independent,  
518 and dependent manner. Y axis is variance stabilized data, the product of log transforming and library size  
519 correcting raw gene counts. C = control, E = exposed, I = infected. Black lines are Rob and magenta lines  
520 are Gos.

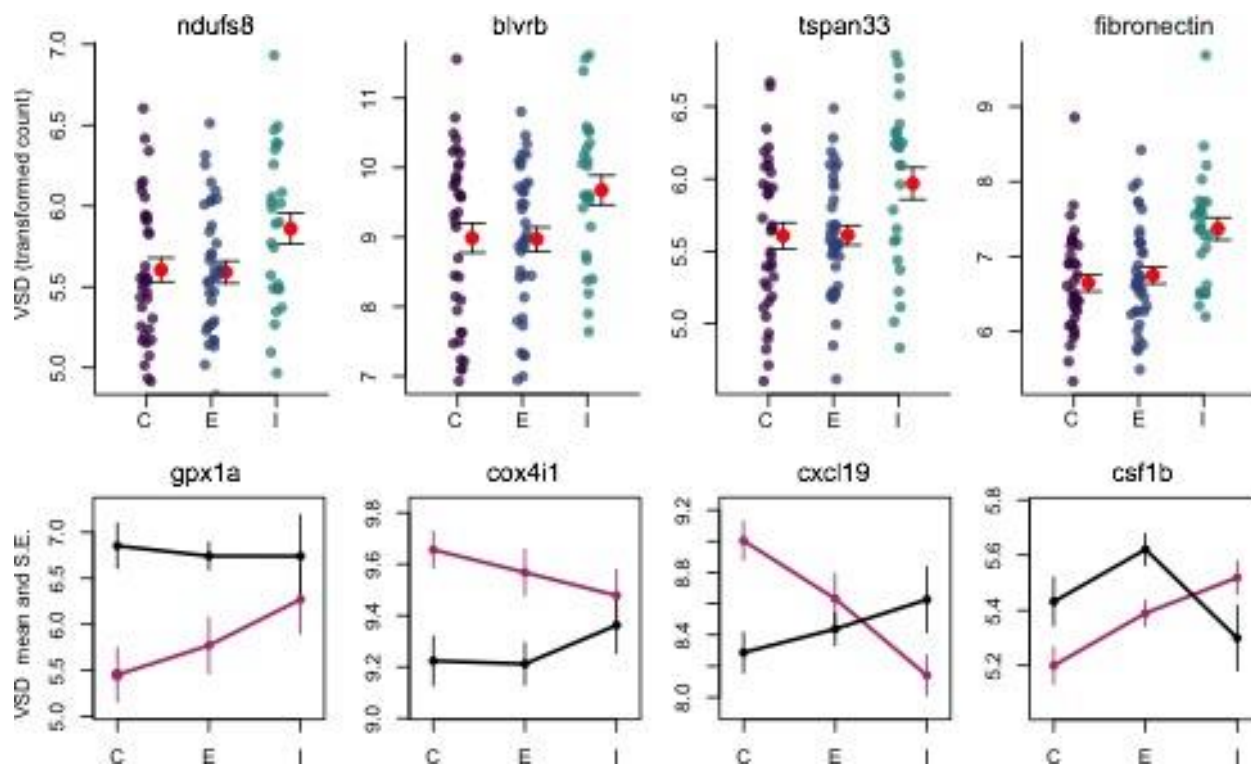

521

522 **Figure 3.** Weighed coexpression gene network analysis suggest that host response to cestodes involves  
 523 two traits, the initial immune response (salmon, purple, black, yellow, brown) and the control over  
 524 parasite growth (magenta and greenyellow). Each cell indicates the correlation between the module and  
 525 the p-value for that correlation (in parentheses). Correlations weaker than 0.07 were omitted.

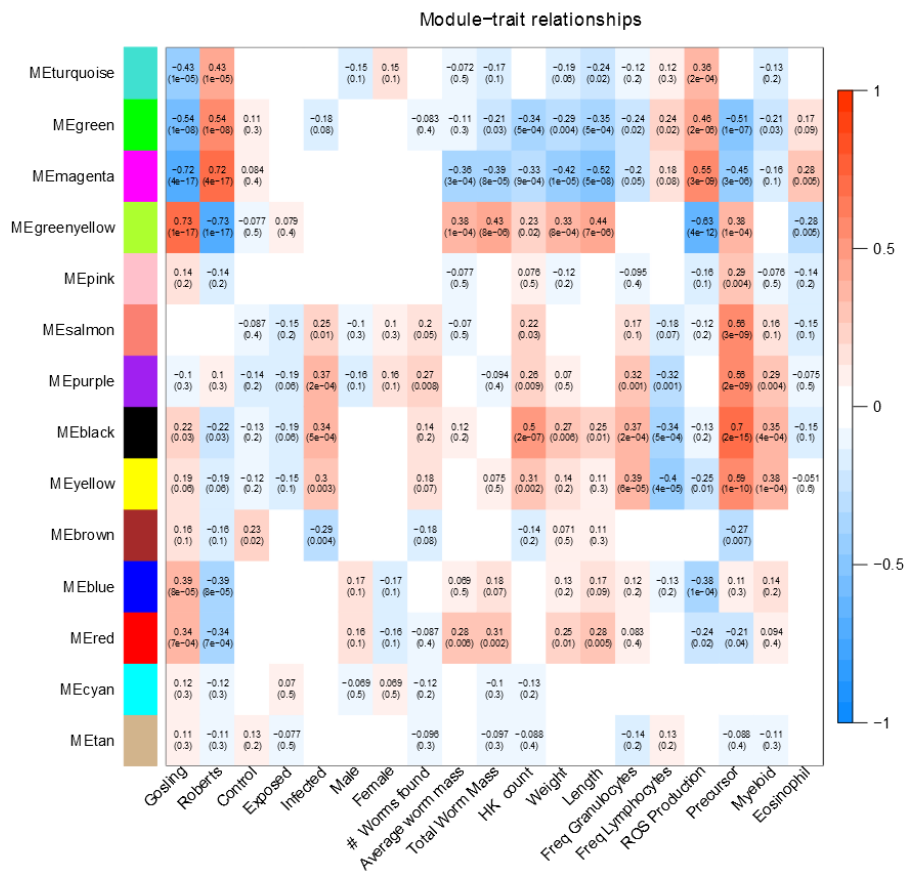

526

527 **Table 1.** Candidate genes; Ensembl IDs, gene names, log2 fold changes, 10% FDR corrected p-values,  
 528 term in the model for which they are significant, putative function, and interpretation.

| <b>Ensemble ID</b> | <b>Gene name</b>   | <b>Log2 fold change</b> | <b>10% FDR corrected p-value</b> | <b>Model term</b> | <b>Putative function</b> |
|--------------------|--------------------|-------------------------|----------------------------------|-------------------|--------------------------|
| ENSGACG00000004283 | <i>bcl2</i>        | 0.99                    | < 0.01                           | Population        | ROS production           |
| ENSGACG00000018044 | TRIM14             | -1.78                   | < 0.01                           | Population        | Mitochondria             |
| ENSGACG00000011287 | TRIM14             | 1.26                    | < 0.01                           | Population        | Mitochondria             |
| ENSGACG00000000336 | MHC II             | 3.67                    | < 0.01                           | Population        | Antigen presentation     |
| ENSGACG00000017967 | MHC II             | 3.39                    | < 0.01                           | Population        | Antigen presentation     |
| ENSGACG00000017764 | <i>Ndufs8</i>      | 0.88                    | < 0.08                           | Infection         | ROS production           |
| ENSGACG00000012552 | <i>blvrb</i>       | 1.14                    | < 0.07                           | Infection         | ROS removal              |
| ENSGACG00000005065 | <i>nfkbiaa</i>     | -0.49                   | < 0.07                           | Infection         | Inflammation             |
| ENSGACG00000011155 | CD40               | -0.38                   | < 0.1                            | Infection         | Macrophage/ROS           |
| ENSGACG00000015164 | <i>fibronectin</i> | 0.89                    | < 0.07                           | Infection         | Build cysts              |
| ENSGACG00000019698 | <i>Tspan33</i>     | 1.04                    | < 0.07                           | Infection         | Helminth immunity        |
| ENSGACG00000010455 | <i>gpx1a</i>       | -1.86                   | < 0.07                           | Interaction       | ROS removal              |
| ENSGACG00000015963 | <i>cox4i1</i>      | 0.43                    | < 0.06                           | Interaction       | ROS production           |
| ENSGACG00000002844 | <i>csf1b</i>       | -1.11                   | < 0.08                           | Interaction       | Macrophage activation    |
| ENSGACG00000019078 | <i>cxcl19</i>      | -1.17                   | < 0.06                           | Interaction       | B-cell targeting         |

529

530 **Supplementary Material and Data to be Deposited:**

- 531 1. Fish meta data
- 532 2. Excel spreadsheet containing all DEGs
- 533 3. Input data for linear modeling (counts and design matrix)
- 534 4. Code for raw reads processing (generating gene counts)
- 535 5. Code for linear modeling
- 536 6. Code for WCGNA
- 537 7. Additional WCGNA plots
- 538 a. Rob and Gos module-trait correlations
- 539 b. Rob and Gos module similarity
- 540 c. Combined cluster dendrogram
- 541 d. Combined gene-trait relationships
- 542 e. Rob and Gos gene-trait relationships
- 543

544 **References:**

- 545 Akagawa KS, Komuro I, Kanazawa H, Yamazaki T, Mochida K, Kishi F. 2006. Functional heterogeneity  
546 of colony-stimulating factor-induced human monocyte-derived macrophages. *Respirology* 11:S32-S36.
- 547 Anthony RM, Rutitzky LI, Urban JF, Stadecker MJ, Gause WC. 2007. Protective immune mechanisms in  
548 helminth infection. *Nature Reviews Immunology* 7:975-987.
- 549 Barañano DE, Rao M, Ferris CD, Snyder SH. 2002. Biliverdin reductase: A major physiologic  
550 cytoprotectant. *Proceedings of the National Academy of Sciences* 99:16093-16098.
- 551 Barrett JC, Hansoul S, Nicolae DL, Cho JH, Duerr RH, Rioux JD, Brant SR, Silverberg MS, Taylor KD,  
552 Barmada MM. 2008. Genome-wide association defines more than 30 distinct susceptibility loci for  
553 Crohn's disease. *Nature genetics* 40:955-962.
- 554 Barribeau SM, Sadd BM, du Plessis L, Schmid-Hempel P. 2014. Gene expression differences underlying  
555 genotype-by-genotype specificity in a host-parasite system. *Proceeding of the National Academy of*  
556 *Sciences* 111:3496-3501.
- 557 Belperio JA, Keane MP, Arenberg DA, Addison CL, Ehlert JE, Burdick MD, Strieter RM. 2000. CXC  
558 chemokines in angiogenesis. *Journal of leukocyte biology* 68:1-8.
- 559 Beraldi D, McRae AF, Gratten J, Pilkington JG, Slate J, Visscher PM, Pemberton JM. 2007. Quantitative  
560 trait loci (QTL) mapping of resistance to strongyles and coccidia in the free-living Soay sheep (*Ovis*  
561 *aries*). *International journal for parasitology* 37:121-129.
- 562 Beutler B, Du X, Xia Y. 2007. Precis on forward genetics in mice. *Nature immunology* 8:659-664.
- 563 Beutler B, Jiang Z, Georgel P, Crozat K, Croker B, Rutschmann S, Du X, Hoebe K. 2006. Genetic  
564 analysis of host resistance: Toll-like receptor signaling and immunity at large. *Annu. Rev. Immunol.*  
565 24:353-389.
- 566 Choi Y-J, Aliota MT, Mayhew GF, Erickson SM, Christensen BM. 2014. Dual RNA-seq of parasite and  
567 host reveals gene expression dynamics during filarial worm–mosquito interactions. *PLoS Negl Trop Dis*  
568 8:e2905.
- 569 Cookson W, Liang L, Abecasis G, Moffatt M, Lathrop M. 2009. Mapping complex disease traits with  
570 global gene expression. *Nature Reviews Genetics* 10:184-194.
- 571 Dixon GB, Davies SW, Aglyamova GA, Meyer E, Bay LK, Matz MV. 2015. Genomic determinants of  
572 coral heat tolerance across latitudes. *Science* 348:1460-1462.
- 573 Eizaguirre C, Lenz TL, Kalbe M, Milinski M. 2012. Rapid and adaptive evolution of MHC genes under  
574 parasite selection in experimental vertebrate populations. *Nature communications* 3:621.
- 575 Emilsson V, Thorleifsson G, Zhang B, Leonardson AS, Zink F, Zhu J, Carlson S, Helgason A, Walters  
576 GB, Gunnarsdottir S. 2008. Genetics of gene expression and its effect on disease. *Nature* 452:423-428.

- 577 Fischer U, Koppang EO, Nakanishi T. 2013. Teleost T and NK cell immunity. *Fish & Shellfish*  
578 *Immunology* 35:197-206.
- 579 Fischer U, Utke K, Somamoto T, Kollner B, Ototake M, Nakanishi T. 2006. Cytotoxic activities of fish  
580 leucocytes. *Fish & Shellfish Immunology* 20:209-226.
- 581 Gause WC, Wynn TA, Allen JE. 2013. Type 2 immunity and wound healing: evolutionary refinement of  
582 adaptive immunity by helminths. *Nature Reviews Immunology* 13:607-614.
- 583 Geary TG, Sakanari JA, Caffrey CR. 2015. Anthelmintic Drug Discovery: Into the Future. *The Journal of*  
584 *parasitology* 101:125-133.
- 585 Geary TG, Thompson DP, Klein RD. 1999. Mechanism-based screening: discovery of the next generation  
586 of anthelmintics depends upon more basic research. *International journal for parasitology* 29:105-112.
- 587 Gratchev A, Guillot P, Hakiy N, Politz O, Orfanos C, Schledzewski K, Goerdts S. 2001. Alternatively  
588 Activated Macrophages Differentially Express Fibronectin and Its Splice Variants and the Extracellular  
589 Matrix Protein  $\beta$ IG-H3. *Scandinavian journal of immunology* 53:386-392.
- 590 Grewal IS, Flavell RA. 1998. CD40 and CD154 in cell-mediated immunity. *Annual review of*  
591 *immunology* 16:111-135.
- 592 Hawley DM, Altizer SM. 2011. Disease ecology meets ecological immunology: understanding the links  
593 between organismal immunity and infection dynamics in natural populations. *Functional Ecology* 25:48-  
594 60.
- 595 Hevezi P, Vences-Catalan F, Maravillas-Montero JL, White CA, Casali P, Llorente L, Jakez-Ocampo J,  
596 Lima G, Vilches-Cisneros N, Flores-Gutiérrez JP. 2013. TSPAN33 is a novel marker of activated and  
597 malignant B cells. *Clinical Immunology* 149:388-399.
- 598 Hohenlohe PA, Bassham S, Etter PD, Stiffler N, Johnson EA, Cresko WA. 2010. Population genomics of  
599 parallel adaptation in threespine stickleback using sequenced RAD tags. *PLoS Genetics* 6:e1000862.
- 600 Huang Y, Chain FJ, Panchal M, Eizaguirre C, Kalbe M, Lenz TL, Samonte IE, Stoll M, Bornberg-Bauer  
601 E, Reusch TB. 2016. Transcriptome profiling of immune tissues reveals habitat-specific gene expression  
602 between lake and river sticklebacks. *Molecular ecology*.
- 603 Hubner N, Wallace CA, Zimdahl H, Petretto E, Schulz H, Maciver F, Mueller M, Hummel O, Monti J,  
604 Zidek V. 2005. Integrated transcriptional profiling and linkage analysis for identification of genes  
605 underlying disease. *Nature genetics* 37:243-253.
- 606 Kalbe M, Eizaguirre C, Scharsack JP, Jakobsen PJ. 2016. Reciprocal cross infection of sticklebacks with  
607 the diphyllbothriidean cestode *Schistocephalus solidus* reveals consistent population differences in  
608 parasite growth and host resistance. *Parasites & vectors* 9:1.
- 609 Kauffmann A, Gentleman R, Huber W. 2009. arrayQualityMetrics—a bioconductor package for quality  
610 assessment of microarray data. *Bioinformatics* 25:415-416.



- 611 Kurtz J, Kalbe M, Aeschlimann PB, Haberli MA, Wegner KM, Reusch TBH, Milinski M. 2004. Major  
612 histocompatibility complex diversity influences parasite resistance and innate immunity in sticklebacks  
613 *Proceedings of the Royal Society of London* 271:197-204.
- 614 Langfelder P, Horvath S. 2008. WGCNA: an R package for weighted correlation network analysis. *BMC*  
615 *bioinformatics* 9:559.
- 616 Lenz TL, Eizaguirre C, Kalbe M, Milinski M. 2013. Evaluating patterns of convergent evolution and trans-  
617 species polymorphism at MHC immunogenes in two sympatric stickleback species. *Evolution* 67:2400-  
618 2412.
- 619 Lenz TL, Eizaguirre C, Rotter B, Kalbe M, Milinski M. 2013. Exploring local immunological adaptation  
620 of two stickleback ecotypes by experimental infection and transcriptome-wide digital gene expression  
621 analysis. *Molecular ecology* 22:774-786.
- 622 Lohman BK, Weber JN, Bolnick DI. 2016. Evaluation of TagSeq, a reliable low-cost alternative for  
623 RNAseq. *Molecular ecology resources*.
- 624 MacColl ADC. 2009. Parasite burdens differ between sympatric three-spined stickleback species.  
625 *Ecography* 32:153-160.
- 626 Maizels RM, Balic A, Gomez-Escobar N, Nair M, Taylor MD, Allen JE. 2004. Helminth parasites—  
627 masters of regulation. *Immunological reviews* 201:89-116.
- 628 Maizels RM, Yazdanbakhsh M. 2003. Immune regulation by helminth parasites: cellular and molecular  
629 mechanisms. *Nature Reviews Immunology* 3:733-744.
- 630 Martindale JL, Holbrook NJ. 2002. Cellular response to oxidative stress: Signaling for suicide and  
631 survival\*. *Journal of cellular physiology* 192:1-15.
- 632 Murphy KM. 2011. *Janeway's Immunobiology*: Garland Science.
- 633 Pasaniuc B, Price AL. 2016. Dissecting the genetics of complex traits using summary association  
634 statistics. *Nature Reviews Genetics*.
- 635 Pedersen AB, Babayan SA. 2011. Wild immunology. *Molecular ecology* 20:872-880.
- 636 Perez-Martinez C, Zlotnik A, Santos-Argumedo L. 2015. Tspan33 is differentially expressed during B  
637 cell differentiation (LYM7P. 620). *The Journal of Immunology* 194:200.212-200.212.
- 638 Procaccio V, Depetris D, Soularue P, Mattei M-G, Lunardi J, Issartel J-P. 1997. cDNA sequence and  
639 chromosomal localization of the NDUFS8 human gene coding for the 23 kDa subunit of the  
640 mitochondrial complex I. *Biochimica et Biophysica Acta (BBA)-Gene Structure and Expression* 1351:37-  
641 41.
- 642 Reusch TB, Schaschl H, Wegner KM. 2004. Recent duplication and inter-locus gene conversion in major  
643 histocompatibility class II genes in a teleost, the three-spined stickleback. *Immunogenetics* 56:427-437.

- 644 Reusch TBH, Langefors Å. 2005. Inter- and Intralocus Recombination Drive MHC Class IIB Gene  
645 Diversification in a Teleost, the Three-Spined Stickleback *Gasterosteus aculeatus*. *Journal of Molecular*  
646 *Evolution* 61:531-541.
- 647 Ritchie ME, Phipson B, Wu D, Hu Y, Law CW, Shi W, Smyth GK. 2015. limma powers differential  
648 expression analyses for RNA-sequencing and microarray studies. *Nucleic acids research*:gkv007.
- 649 Sato A, Figueroa F, O'hUigin C, Steck N, Klein J. 1998. Cloning of major histocompatibility complex  
650 (Mhc) genes from threespine stickleback, *Gasterosteus aculeatus*. *Molecular Marine Biology and*  
651 *Biotechnology* 7:221–231.
- 652 Schärer L, Wedekind C. 1999. Lifetime reproductive output in a hermaphrodite cestode when reproducing  
653 alone or in pairs: a time cost of pairing. *Evolutionary Ecology* 13:381-394.
- 654 Scharsack JP, Kalbe M, Derner R, Millinski M. 2004. Modulation of granulocyte responses in three-  
655 spined sticlebacks *Gasterosteus aculeatus* infected with the tapeworm *Schistocephalus solidus*. *Diseases*  
656 *of Aquatic Organisms* 59:141-150.
- 657 Scharsack JP, Koch K, Hammerschmidt K. 2007. Who is in control of the stickleback immune system:  
658 interactions between *Schistocephalus solidus* and its specific vertebrate host. *Proceedings of the Royal*  
659 *Society B: Biological Sciences* 274:3151-3158.
- 660 Schielzeth H, Husby A. 2014. Challenges and prospects in genome-wide quantitative trait loci mapping of  
661 standing genetic variation in natural populations. *Annals of the New York Academy of Sciences* 1320:35-  
662 57.
- 663 Shin MH, Lee YA, Min D-Y. 2009. Eosinophil-mediated tissue inflammatory responses in helminth  
664 infection. *The Korean journal of parasitology* 47:S125-S131.
- 665 Snowberg LK, Hendrix KM, Bolnick DI. 2015. Covarying variances: more morphologically variable  
666 populations also exhibit more diet variation. *Oecologia* 178:89-101.
- 667 Stutz W, Bolnick D. 2016. NATURAL SELECTION ON MHC IIB IN PARAPATRIC LAKE AND  
668 STREAM STICKLEBACK: BALANCING, DIVERGENT, BOTH, OR NEITHER? bioRxiv.
- 669 Stutz WE, Schmerer M, Coates JL, Bolnick DI. 2015. Among-lake reciprocal transplants induce  
670 convergent expression of immune genes in threespine stickleback. *Molecular ecology*.
- 671 Todd EV, Black MA, Gemmell NJ. 2016. The power and promise of RNA-seq in ecology and evolution.  
672 *Molecular ecology*.
- 673 Turrens JF. 2003. Mitochondrial formation of reactive oxygen species. *The Journal of physiology*  
674 552:335-344.
- 675 Verma IM, Stevenson JK, Schwarz EM, Van Antwerp D, Miyamoto S. 1995. Rel/NF-kappa B/I kappa B  
676 family: intimate tales of association and dissociation. *Genes & development* 9:2723-2735.

677 Viney M, Lazarou L, Abolins S. 2015. The laboratory mouse and wild immunology. *Parasite*  
678 *immunology* 37:267-273.

679 Wang T, Hanington PC, Belosevic M, Secombes CJ. 2008. Two macrophage colony-stimulating factor  
680 genes exist in fish that differ in gene organization and are differentially expressed. *The Journal of*  
681 *Immunology* 181:3310-3322.

682 Weber JN, Kalbe M, Shim KC, Erin NI, Steinel NC, Ma L, Bolnick DI, Nuismer SL, Michalakis Y. 2017.  
683 Resist globally, infect locally: a transcontinental test of adaptation by stickleback and their tapeworm  
684 parasite. *The American Naturalist* 189:43-57.

685 Weber JN, Steinel NC, Shim KC, Bolnick DI. 2016. Recent evolution of cestode growth suppression by  
686 threespine stickleback. *bioRxiv*.

687 Wegner KM, Kalbe M, Rauch G, Kurtz J, Schaschl H, Reusch TBH. 2006. Genetic variation in MHC  
688 class II expression and interactions with MHC sequence polymorphism in three-spined sticklebacks.  
689 *Molecular ecology* 15:1153-1164.

690 Wijayawardena BK, Minchella DJ, DeWoody JA. (Wijayawardena2016 co-authors). 2016. The influence  
691 of trematode parasite burden on gene expression in a mammalian host. *BMC genomics* 17:600.

692 Wittamer V, Bertrand JY, Gutschow PW, Traver D. 2011. Characterization of the mononuclear phagocyte  
693 system in zebrafish. *Blood* 117:7126-7135.

694 Wright RM, Aglyamova GV, Meyer E, Matz MV. 2015. Gene expression associated with white  
695 syndromes in a reef building coral, *Acropora hyacinthus*. *BMC genomics* 16:371.

696 Zeisberg M, Strutz F, Müller GA. 1999. Role of fibroblast activation in inducing interstitial fibrosis.  
697 *Journal of nephrology* 13:S111-120.

698 Zhou Z, Jia X, Xue Q, Dou Z, Ma Y, Zhao Z, Jiang Z, He B, Jin Q, Wang J. 2014. TRIM14 is a  
699 mitochondrial adaptor that facilitates retinoic acid-inducible gene-I-like receptor-mediated innate  
700 immune response. *Proceedings of the National Academy of Sciences* 111:E245-E254.

701

VSD mean and S.E.

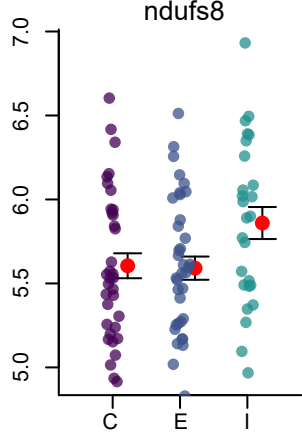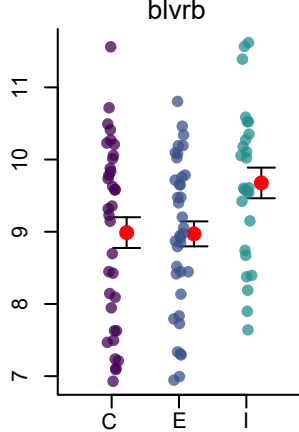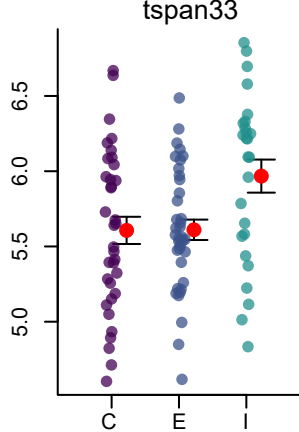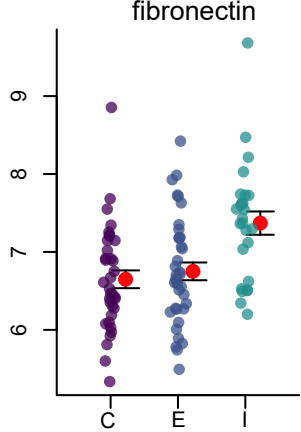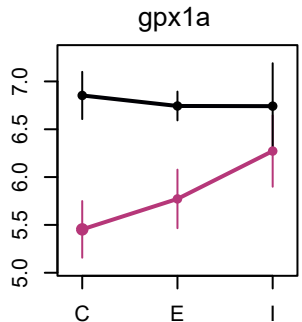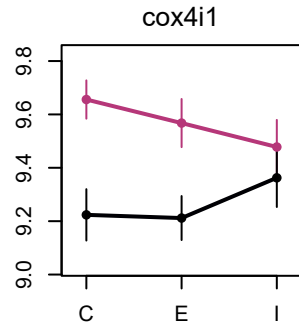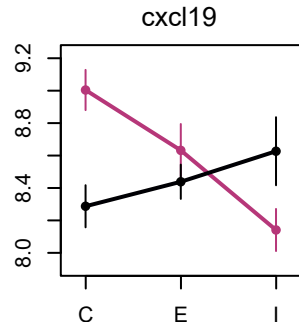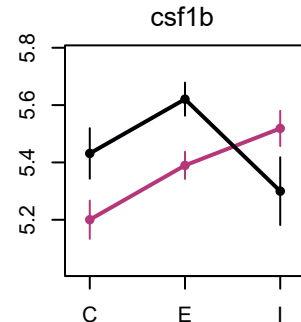

# Module-trait relationships

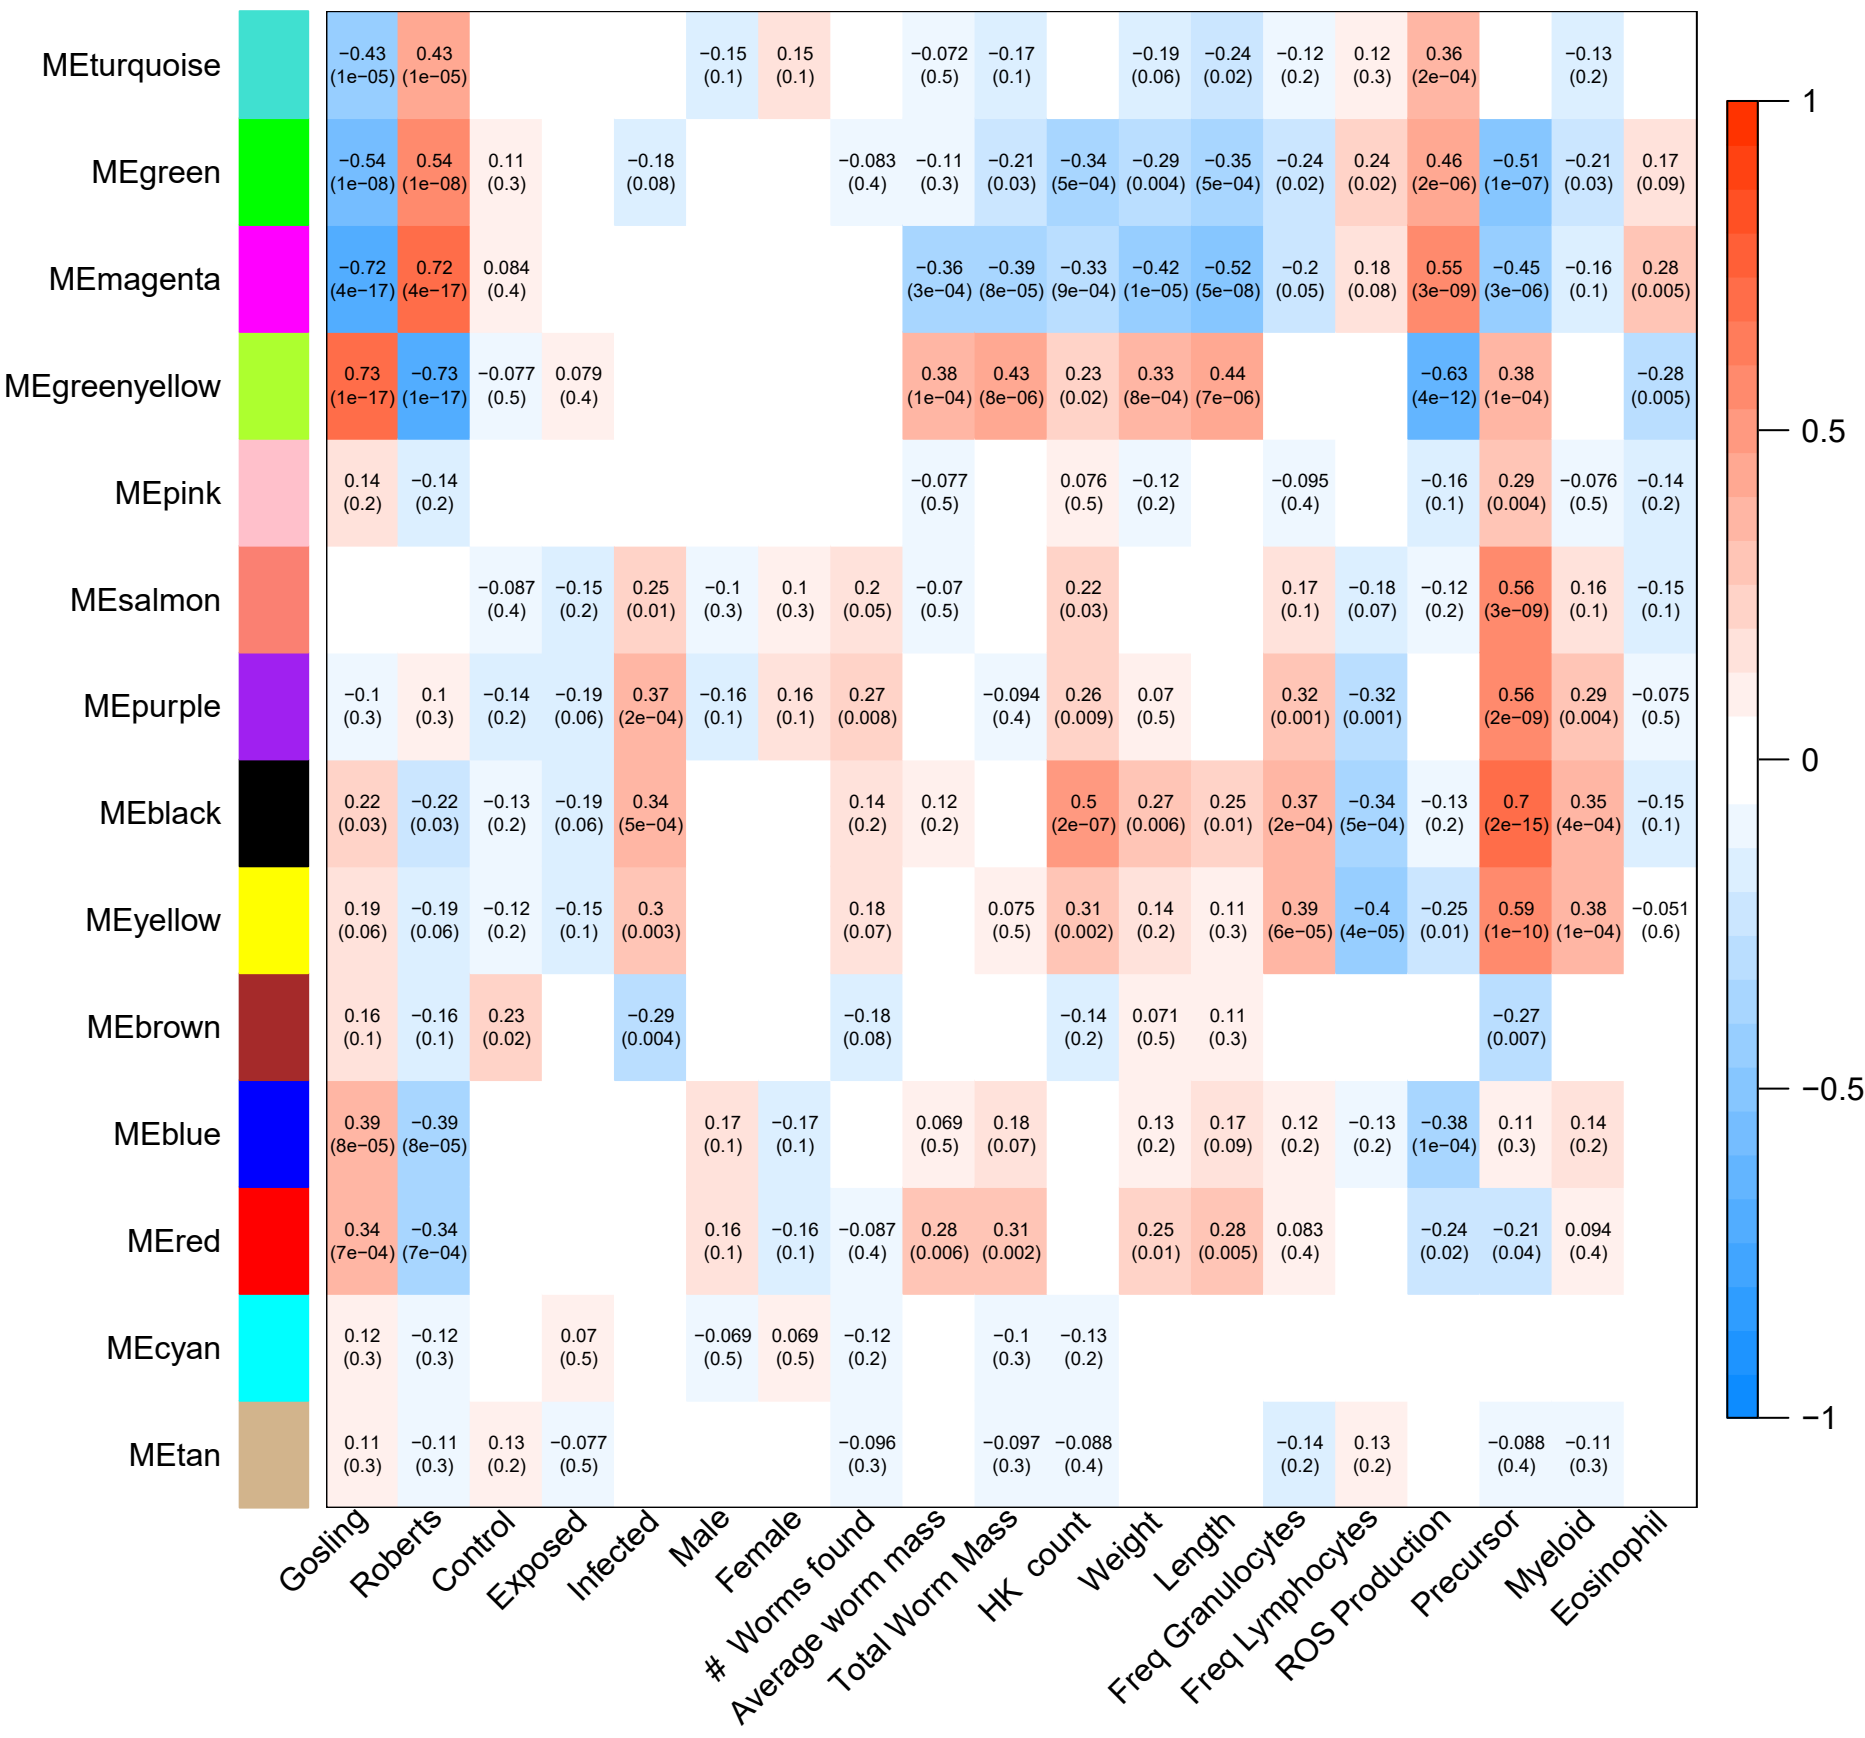

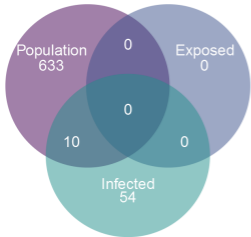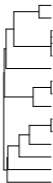

9/28 preribosome  
 92/338 nucleolus  
 97/386 ribonucleoprotein complex  
 6/7 U2 snRNP  
 12/31 small nuclear ribonucleoprotein complex  
 13/75 spindle  
 87/394 mitochondrial part  
 16/77 mitochondrial matrix  
 59/254 mitochondrial membrane  
 17/99 plasma membrane protein complex  
 78/436 plasma membrane part  
 41/229 membrane region  
 5/12 multivesicular body  
 26/107 vacuolar part  
 32/244 cytoskeleton

$p < 0.01$   
 $p < 0.05$   
 $p < 0.1$
